# Supplementary material for: A giant 2-dimensional dielectric response in a compressed hydrogen-bonded hybrid organic–inorganic salt
Source: Royal Society of Chemistry journal article supplement (doi:10.1039/c8tc02464b), 2018-01-01
Supplement: c8tc02464b1.pdf [file c8tc02464b1.pdf]

# Supporting Information

## Giant 2-Dimensional Dielectric Response in a Compressed Hydrogen-Bonded Hybrid Organic-Inorganic Salt

Damian Paliwoda,<sup>1,2</sup> Marek Szafranski,<sup>3\*</sup> Michael Hanfland<sup>2</sup>  
and Andrzej Katrusiak<sup>1\*</sup>

<sup>1</sup> Faculty of Chemistry, Adam Mickiewicz University, Umultowska 89b, 61-614 Poznań, Poland

<sup>2</sup> European Synchrotron Radiation Facility, BP 220, F-38047 Grenoble, Cedex, France

<sup>3</sup> Faculty of Physics, Adam Mickiewicz University, Umultowska 85, 61-614 Poznań, Poland

\*E-mail: katran@amu.edu.pl; masza@amu.edu.pl

### Contents

1. **Table S1.** Crystal data and structure refinement details for pyrazinium tetrachloroaurate crystals. X-ray diffraction studies in the function of temperature.
2. **Table S2.** Crystal data and structure refinement details for pyrazinium tetrachloroaurate crystals. X-ray diffraction studies in the function of pressure.
3. **Figure S1.** Aggregation types of tetrachloroaurate anions in the crystal structures retrieved from the Cambridge Structural Database. The illustrated aggregates are described by the deposit refcode.
4. **Figure S2.** Short interionic contacts in the structure of pyrazinium tetrachloroaurate: a perspective view of the structure with the contacts indicated by black lines (left) and one sheet of AuCl<sub>4</sub><sup>-</sup> anions linked by Au...Cl interactions (right).
5. **Figure S3.** Short interionic contacts in the structure of pyrazinium tetrachloroaurate PyrH<sup>+</sup>AuCl<sub>4</sub><sup>-</sup> as a function of temperature and pressure (*cf.* Figure 3). Note the estimated standard deviations smaller than the symbols.
6. **Figure S4.** TGA runs measured at the rate of temperature changes 10 and 1 K/min.
7. **Figure S5.** DSC cooling and heating runs measured at the temperature rate of 10 K/min.
8. **Figure S6.** Pressure dependence of the real and imaginary parts of electric permittivity measured at 297 K for the 1 MHz frequency of electric field.

**Table S1.** Crystal data and structure refinement details for pyrazinium tetrachloroaurate crystals. X-ray diffraction studies in the function of temperature.

|                                                    |                                                                |                                                                |                                                                |                                                                |                                                                |                                                                |                                                                |
|----------------------------------------------------|----------------------------------------------------------------|----------------------------------------------------------------|----------------------------------------------------------------|----------------------------------------------------------------|----------------------------------------------------------------|----------------------------------------------------------------|----------------------------------------------------------------|
| Temperature, K                                     | 130(2)                                                         | 160(2)                                                         | 190(2)                                                         | 220(2)                                                         | 250(2)                                                         | 270(2)                                                         | 285(2)                                                         |
| Pressure                                           | 0.01 MPa                                                       |
| Formula                                            | C <sub>4</sub> N <sub>2</sub> H <sub>5</sub> AuCl <sub>4</sub> | C <sub>4</sub> N <sub>2</sub> H <sub>5</sub> AuCl <sub>4</sub> | C <sub>4</sub> N <sub>2</sub> H <sub>5</sub> AuCl <sub>4</sub> | C <sub>4</sub> N <sub>2</sub> H <sub>5</sub> AuCl <sub>4</sub> | C <sub>4</sub> N <sub>2</sub> H <sub>5</sub> AuCl <sub>4</sub> | C <sub>4</sub> N <sub>2</sub> H <sub>5</sub> AuCl <sub>4</sub> | C <sub>4</sub> N <sub>2</sub> H <sub>5</sub> AuCl <sub>4</sub> |
| Fw, g/mol                                          | 419.87                                                         | 419.87                                                         | 419.87                                                         | 419.87                                                         | 419.87                                                         | 419.87                                                         | 419.87                                                         |
| crystal size, mm <sup>3</sup>                      | 0.20x0.20x0.50                                                 |
| crystal colour                                     | orange                                                         |
| crystal system                                     | tetragonal                                                     |
| space group, Z                                     | <i>P</i> 4 <sub>2</sub> / <i>ncm</i> , 4                       |
| <i>a</i> , Å                                       | 7.83920(10)                                                    | 7.84680(10)                                                    | 7.85600(10)                                                    | 7.86500(10)                                                    | 7.87450(10)                                                    | 7.88180(10)                                                    | 7.89140(10)                                                    |
| <i>b</i> , Å                                       | 7.83920(10)                                                    | 7.84680(10)                                                    | 7.85600(10)                                                    | 7.86500(10)                                                    | 7.87450(10)                                                    | 7.88180(10)                                                    | 7.89140(10)                                                    |
| <i>c</i> , Å                                       | 15.7523(3)                                                     | 15.7718(4)                                                     | 15.7916(4)                                                     | 15.8105(4)                                                     | 15.8305(4)                                                     | 15.8455(4)                                                     | 15.8623(3)                                                     |
| $\beta$ , °                                        | 90                                                             | 90                                                             | 90                                                             | 90                                                             | 90                                                             | 90                                                             | 90                                                             |
| <i>V</i> , Å <sup>3</sup>                          | 968.03(3)                                                      | 971.11(3)                                                      | 974.61(3)                                                      | 978.01(3)                                                      | 981.61(3)                                                      | 984.37(3)                                                      | 987.81(3)                                                      |
| $\rho$ , g/cm <sup>3</sup>                         | 2.881                                                          | 2.872                                                          | 2.861                                                          | 2.852                                                          | 2.841                                                          | 2.833                                                          | 2.823                                                          |
| $\mu$ , mm <sup>-1</sup>                           | 16.239                                                         | 16.188                                                         | 16.130                                                         | 16.074                                                         | 16.015                                                         | 15.970                                                         | 15.914                                                         |
| F(000)                                             | 760                                                            | 760                                                            | 760                                                            | 760                                                            | 760                                                            | 760                                                            | 760                                                            |
| $\vartheta$ range, °                               | 2.59-28.93                                                     | 2.58-29.03                                                     | 2.58-28.99                                                     | 2.58-29.10                                                     | 2.57-29.10                                                     | 2.57-29.09                                                     | 2.57-34.79                                                     |
| limiting indices                                   | -9⇒ <i>h</i> ⇒10<br>-10⇒ <i>k</i> ⇒10<br>-21⇒ <i>l</i> ⇒20     | -10⇒ <i>h</i> ⇒9<br>-10⇒ <i>k</i> ⇒10<br>-20⇒ <i>l</i> ⇒21     | -9⇒ <i>h</i> ⇒10<br>-10⇒ <i>k</i> ⇒10<br>-20⇒ <i>l</i> ⇒21     | -9⇒ <i>h</i> ⇒10<br>-10⇒ <i>k</i> ⇒10<br>-21⇒ <i>l</i> ⇒20     | -9⇒ <i>h</i> ⇒10<br>-10⇒ <i>k</i> ⇒10<br>-21⇒ <i>l</i> ⇒21     | -9⇒ <i>h</i> ⇒10<br>-10⇒ <i>k</i> ⇒10<br>-21⇒ <i>l</i> ⇒21     | -12⇒ <i>h</i> ⇒12<br>-12⇒ <i>k</i> ⇒12<br>-23⇒ <i>l</i> ⇒24    |
| reflns collected                                   | 5914                                                           | 5842                                                           | 5963                                                           | 5990                                                           | 6025                                                           | 6067                                                           | 14347                                                          |
| R <sub>int</sub>                                   | 0.0766                                                         | 0.0750                                                         | 0.0759                                                         | 0.0757                                                         | 0.0759                                                         | 0.0788                                                         | 0.0586                                                         |
| data/parameters                                    | 694/37                                                         | 691/34                                                         | 700/34                                                         | 704/34                                                         | 706/34                                                         | 709/34                                                         | 1145/33                                                        |
| GOF on F <sup>2</sup>                              | 1.147                                                          | 1.138                                                          | 1.132                                                          | 1.143                                                          | 1.110                                                          | 1.075                                                          | 1.061                                                          |
| <i>R</i> <sub>1</sub> [ <i>I</i> > 2σ( <i>I</i> )] | 0.0353                                                         | 0.0388                                                         | 0.0375                                                         | 0.0367                                                         | 0.0370                                                         | 0.0361                                                         | 0.0333                                                         |
| <i>R</i> <sub>1</sub> (all data)                   | 0.0398                                                         | 0.0441                                                         | 0.0428                                                         | 0.0431                                                         | 0.0447                                                         | 0.0449                                                         | 0.0478                                                         |
| <i>wR</i> <sub>2</sub> (all data)                  | 0.1165                                                         | 0.1199                                                         | 0.1159                                                         | 0.1126                                                         | 0.1117                                                         | 0.1080                                                         | 0.1002                                                         |
| completeness<br>to theta max.                      | 98.2 %                                                         | 98.0 %                                                         | 98.2 %                                                         | 97.4 %                                                         | 97.0 %                                                         | 97.1 %                                                         | 98.6 %                                                         |
| lrgst diff peak, e/Å <sup>3</sup>                  | 2.362                                                          | 3.649                                                          | 3.456                                                          | 3.213                                                          | 2.943                                                          | 2.738                                                          | 5.083                                                          |
| lrgst diff hole, e/Å <sup>3</sup>                  | -2.415                                                         | -2.085                                                         | -1.817                                                         | -1.460                                                         | -1.429                                                         | -1.251                                                         | -2.307                                                         |

**Table S2.** Crystal data and structure refinement details for pyrazinium tetrachloroaurate crystals. X-ray diffraction studies in the function of pressure.

| hydrostatic medium                                 | helium                                                         |
|----------------------------------------------------|----------------------------------------------------------------|----------------------------------------------------------------|----------------------------------------------------------------|----------------------------------------------------------------|----------------------------------------------------------------|----------------------------------------------------------------|----------------------------------------------------------------|
| temperature, K                                     | 296(2)                                                         | 296(2)                                                         | 296(2)                                                         | 296(2)                                                         | 296(2)                                                         | 296(2)                                                         | 296(2)                                                         |
| Pressure, GPa                                      | 0.01 MPa                                                       | 0.40                                                           | 1.23                                                           | 2.01                                                           | 2.77                                                           | 4.035                                                          | 6.165                                                          |
| Formula                                            | C <sub>4</sub> N <sub>2</sub> H <sub>5</sub> AuCl <sub>4</sub> | C <sub>4</sub> N <sub>2</sub> H <sub>5</sub> AuCl <sub>4</sub> | C <sub>4</sub> N <sub>2</sub> H <sub>5</sub> AuCl <sub>4</sub> | C <sub>4</sub> N <sub>2</sub> H <sub>5</sub> AuCl <sub>4</sub> | C <sub>4</sub> N <sub>2</sub> H <sub>5</sub> AuCl <sub>4</sub> | C <sub>4</sub> N <sub>2</sub> H <sub>5</sub> AuCl <sub>4</sub> | C <sub>4</sub> N <sub>2</sub> H <sub>5</sub> AuCl <sub>4</sub> |
| Fw, g/mol                                          | 419.87                                                         | 419.87                                                         | 419.87                                                         | 419.87                                                         | 419.87                                                         | 419.87                                                         | 419.87                                                         |
| crystal size, mm <sup>3</sup>                      | 0.02x0.04x0.05                                                 |
| crystal colour                                     | orange                                                         |
| crystal system                                     | tetragonal                                                     |
| space group, Z                                     | <i>P4<sub>2</sub>/ncm</i> , 4                                  |
| <i>a</i> , Å                                       | 7.88220(10)                                                    | 7.7706(3)                                                      | 7.6937(2)                                                      | 7.62920(10)                                                    | 7.56550(10)                                                    | 7.4964(2)                                                      | 7.38700(10)                                                    |
| <i>b</i> , Å                                       | 7.88220(10)                                                    | 7.7706(3)                                                      | 7.6937(2)                                                      | 7.62920(10)                                                    | 7.56550(10)                                                    | 7.4964(2)                                                      | 7.38700(10)                                                    |
| <i>c</i> , Å                                       | 15.8523(5)                                                     | 15.666(12)                                                     | 15.618(3)                                                      | 15.259(6)                                                      | 15.437(5)                                                      | 15.034(8)                                                      | 14.791(8)                                                      |
| $\beta$ , °                                        | 90                                                             | 90                                                             | 90                                                             | 90                                                             | 90                                                             | 90                                                             | 90                                                             |
| <i>V</i> , Å <sup>3</sup>                          | 984.89(4)                                                      | 946.0(7)                                                       | 909.8(6)                                                       | 888.1(4)                                                       | 867.0(3)                                                       | 844.9(4)                                                       | 807.1(4)                                                       |
| $\rho$ , g/cm <sup>3</sup>                         | 2.832                                                          | 2.931                                                          | 3.065                                                          | 3.140                                                          | 3.217                                                          | 3.301                                                          | 3.455                                                          |
| $\mu$ , mm <sup>-1</sup>                           | 15.961                                                         | 16.524                                                         | 17.278                                                         | 17.700                                                         | 18.132                                                         | 18.607                                                         | 19.478                                                         |
| F(000)                                             | 760                                                            | 760                                                            | 760                                                            | 760                                                            | 760                                                            | 760                                                            | 760                                                            |
| $\vartheta$ range, °                               | 3.65-30.28                                                     | 3.93-36.51                                                     | 3.97-35.88                                                     | 4.01-36.39                                                     | 4.04-36.58                                                     | 4.08-37.14                                                     | 4.14-37.62                                                     |
| limiting indices                                   | -11⇒h⇒11                                                       | -12⇒h⇒12                                                       | -12⇒h⇒12                                                       | -12⇒h⇒12                                                       | -12⇒h⇒12                                                       | -12⇒h⇒11                                                       | -12⇒h⇒11                                                       |
|                                                    | -11⇒k⇒11                                                       | -12⇒k⇒11                                                       | -12⇒k⇒11                                                       | -11⇒k⇒12                                                       | -12⇒k⇒11                                                       | -12⇒k⇒12                                                       | -12⇒k⇒12                                                       |
|                                                    | -22⇒l⇒22                                                       | -6⇒l⇒7                                                         | -6⇒l⇒7                                                         | -6⇒l⇒7                                                         | -6⇒l⇒6                                                         | -6⇒l⇒6                                                         | -6⇒l⇒6                                                         |
| reflins collected                                  | 23555                                                          | 1570                                                           | 1475                                                           | 1454                                                           | 1429                                                           | 1393                                                           | 1375                                                           |
| R <sub>int</sub>                                   | 0.0318                                                         | 0.0324                                                         | 0.0356                                                         | 0.0320                                                         | 0.0327                                                         | 0.0310                                                         | 0.0373                                                         |
| data/parameters                                    | 797/38                                                         | 320/33                                                         | 298/33                                                         | 295/33                                                         | 291/33                                                         | 280/33                                                         | 274/33                                                         |
| GOF on F <sup>2</sup>                              | 1.181                                                          | 1.119                                                          | 1.110                                                          | 1.150                                                          | 1.231                                                          | 1.247                                                          | 1.269                                                          |
| <i>R</i> <sub>i</sub> [ <i>I</i> > 2σ( <i>I</i> )] | 0.0130                                                         | 0.0474                                                         | 0.0410                                                         | 0.0499                                                         | 0.0485                                                         | 0.0512                                                         | 0.0543                                                         |
| <i>R</i> <sub>i</sub> (all data)                   | 0.0175                                                         | 0.0640                                                         | 0.0526                                                         | 0.0606                                                         | 0.0605                                                         | 0.0619                                                         | 0.0663                                                         |
| <i>wR</i> <sub>2</sub> (all data)                  | 0.0263                                                         | 0.0865                                                         | 0.0830                                                         | 0.1191                                                         | 0.1176                                                         | 0.1204                                                         | 0.1376                                                         |
| completeness<br>to theta max.                      | 98.4 %                                                         | 25.4 %                                                         | 25.8 %                                                         | 24.9 %                                                         | 24.9 %                                                         | 23.7 %                                                         | 23.5 %                                                         |
| lrgst diff peak, e/Å <sup>3</sup>                  | 0.902                                                          | 0.700                                                          | 0.605                                                          | 0.957                                                          | 0.987                                                          | 0.997                                                          | 1.084                                                          |
| lrgst diff hole, e/Å <sup>3</sup>                  | -0.365                                                         | -0.640                                                         | -0.499                                                         | -0.640                                                         | -0.702                                                         | -0.821                                                         | -0.771                                                         |

**Table S2.** Crystal data and structure refinement details for pyrazinium tetrachloroaurate crystals. X-ray diffraction studies in the function of pressure.

| hydrostatic medium                  | helium                                                                                                             | helium                                                                                                             | helium                                                                                                             | helium                                                                                                             | helium                                                                                                             | helium                                                                                                             |
|-------------------------------------|--------------------------------------------------------------------------------------------------------------------|--------------------------------------------------------------------------------------------------------------------|--------------------------------------------------------------------------------------------------------------------|--------------------------------------------------------------------------------------------------------------------|--------------------------------------------------------------------------------------------------------------------|--------------------------------------------------------------------------------------------------------------------|
| temperature, K                      | 296(2)                                                                                                             | 296(2)                                                                                                             | 296(2)                                                                                                             | 296(2)                                                                                                             | 296(2)                                                                                                             | 296(2)                                                                                                             |
| Pressure, GPa                       | 7.85                                                                                                               | 9.23                                                                                                               | 9.685                                                                                                              | 10.655                                                                                                             | 11.98                                                                                                              | 12.675                                                                                                             |
| Formula                             | C <sub>4</sub> N <sub>2</sub> H <sub>5</sub> AuCl <sub>4</sub>                                                     | C <sub>4</sub> N <sub>2</sub> H <sub>5</sub> AuCl <sub>4</sub>                                                     | C <sub>4</sub> N <sub>2</sub> H <sub>5</sub> AuCl <sub>4</sub>                                                     | C <sub>4</sub> N <sub>2</sub> H <sub>5</sub> AuCl <sub>4</sub>                                                     | C <sub>4</sub> N <sub>2</sub> H <sub>5</sub> AuCl <sub>4</sub>                                                     | C <sub>4</sub> N <sub>2</sub> H <sub>5</sub> AuCl <sub>4</sub>                                                     |
| Fw, g/mol                           | 419.87                                                                                                             | 419.87                                                                                                             | 419.87                                                                                                             | 419.87                                                                                                             | 419.87                                                                                                             | 419.87                                                                                                             |
| crystal size, mm <sup>3</sup>       | 0.02x0.04x0.05                                                                                                     | 0.02x0.04x0.05                                                                                                     | 0.02x0.04x0.05                                                                                                     | 0.02x0.04x0.05                                                                                                     | 0.02x0.04x0.05                                                                                                     | 0.02x0.04x0.05                                                                                                     |
| crystal colour                      | orange                                                                                                             | orange                                                                                                             | orange                                                                                                             | orange                                                                                                             | orange                                                                                                             | orange                                                                                                             |
| crystal system                      | tetragonal                                                                                                         | tetragonal                                                                                                         | tetragonal                                                                                                         | tetragonal                                                                                                         | tetragonal                                                                                                         | tetragonal                                                                                                         |
| space group, Z                      | <i>P4<sub>2</sub>/ncm</i> , 4                                                                                      |
| <i>a</i> , Å                        | 7.3190(2)                                                                                                          | 7.2677(3)                                                                                                          | 7.2305(4)                                                                                                          | 7.1959(5)                                                                                                          | 7.1293(6)                                                                                                          | 7.1172(7)                                                                                                          |
| <i>b</i> , Å                        | 7.3190(2)                                                                                                          | 7.2677(3)                                                                                                          | 7.2305(4)                                                                                                          | 7.1959(5)                                                                                                          | 7.1293(6)                                                                                                          | 7.1172(7)                                                                                                          |
| <i>c</i> , Å                        | 14.595(13)                                                                                                         | 14.46(2)                                                                                                           | 14.50(3)                                                                                                           | 14.39(3)                                                                                                           | 14.38(3)                                                                                                           | 14.30(3)                                                                                                           |
| $\beta$ , °                         | 90                                                                                                                 | 90                                                                                                                 | 90                                                                                                                 | 90                                                                                                                 | 90                                                                                                                 | 90                                                                                                                 |
| <i>V</i> , Å <sup>3</sup>           | 781.8(7)                                                                                                           | 764.0(11)                                                                                                          | 758.0(13)                                                                                                          | 745.1(14)                                                                                                          | 730.8(14)                                                                                                          | 724.6(14)                                                                                                          |
| $\rho$ , g/cm <sup>3</sup>          | 3.567                                                                                                              | 3.650                                                                                                              | 3.679                                                                                                              | 3.743                                                                                                              | 3.816                                                                                                              | 3.849                                                                                                              |
| $\mu$ , mm <sup>-1</sup>            | 20.107                                                                                                             | 20.576                                                                                                             | 20.740                                                                                                             | 21.098                                                                                                             | 21.510                                                                                                             | 21.696                                                                                                             |
| F(000)                              | 760                                                                                                                | 760                                                                                                                | 760                                                                                                                | 760                                                                                                                | 760                                                                                                                | 760                                                                                                                |
| $\theta$ range, °                   | 4.18-35.54                                                                                                         | 4.21-35.50                                                                                                         | 4.23-36.03                                                                                                         | 4.25-35.90                                                                                                         | 4.28-36.02                                                                                                         | 4.05-39.20                                                                                                         |
| limiting indices                    | -11 $\Rightarrow$ h $\Rightarrow$ 12<br>-11 $\Rightarrow$ k $\Rightarrow$ 11<br>-6 $\Rightarrow$ l $\Rightarrow$ 6 | -11 $\Rightarrow$ h $\Rightarrow$ 12<br>-11 $\Rightarrow$ k $\Rightarrow$ 11<br>-6 $\Rightarrow$ l $\Rightarrow$ 6 | -11 $\Rightarrow$ h $\Rightarrow$ 12<br>-11 $\Rightarrow$ k $\Rightarrow$ 11<br>-6 $\Rightarrow$ l $\Rightarrow$ 6 | -11 $\Rightarrow$ h $\Rightarrow$ 12<br>-11 $\Rightarrow$ k $\Rightarrow$ 11<br>-6 $\Rightarrow$ l $\Rightarrow$ 6 | -11 $\Rightarrow$ h $\Rightarrow$ 12<br>-11 $\Rightarrow$ k $\Rightarrow$ 11<br>-6 $\Rightarrow$ l $\Rightarrow$ 6 | -11 $\Rightarrow$ h $\Rightarrow$ 12<br>-12 $\Rightarrow$ k $\Rightarrow$ 11<br>-6 $\Rightarrow$ l $\Rightarrow$ 6 |
| reflins collected                   | 1341                                                                                                               | 1264                                                                                                               | 1252                                                                                                               | 1234                                                                                                               | 1135                                                                                                               | 1685                                                                                                               |
| R <sub>int</sub>                    | 0.0420                                                                                                             | 0.0458                                                                                                             | 0.0510                                                                                                             | 0.0542                                                                                                             | 0.0596                                                                                                             | 0.0433                                                                                                             |
| data/parameters                     | 267/33                                                                                                             | 255/33                                                                                                             | 254/33                                                                                                             | 252/33                                                                                                             | 251/33                                                                                                             | 292/33                                                                                                             |
| GOF on F <sup>2</sup>               | 1.139                                                                                                              | 1.235                                                                                                              | 1.226                                                                                                              | 1.187                                                                                                              | 1.177                                                                                                              | 1.037                                                                                                              |
| R <sub>1</sub> [I > 2 $\sigma$ (I)] | 0.0577                                                                                                             | 0.0726                                                                                                             | 0.0767                                                                                                             | 0.0698                                                                                                             | 0.0865                                                                                                             | 0.0822                                                                                                             |
| R <sub>1</sub> (all data)           | 0.0691                                                                                                             | 0.0924                                                                                                             | 0.1045                                                                                                             | 0.1003                                                                                                             | 0.1273                                                                                                             | 0.1457                                                                                                             |
| wR <sub>2</sub> (all data)          | 0.1451                                                                                                             | 0.1986                                                                                                             | 0.1940                                                                                                             | 0.1853                                                                                                             | 0.2170                                                                                                             | 0.3053                                                                                                             |
| completeness<br>to theta max.       | 27.4 %                                                                                                             | 26.7 %                                                                                                             | 25.9 %                                                                                                             | 26.3 %                                                                                                             | 26.3 %                                                                                                             | 25.2 %                                                                                                             |
| lrgst diff peak, e/Å <sup>3</sup>   | 1.126                                                                                                              | 1.281                                                                                                              | 1.093                                                                                                              | 0.855                                                                                                              | 0.813                                                                                                              | 1.519                                                                                                              |
| lrgst diff hole, e/Å <sup>3</sup>   | -0.823                                                                                                             | -0.886                                                                                                             | -0.659                                                                                                             | -0.776                                                                                                             | -0.726                                                                                                             | -0.676                                                                                                             |

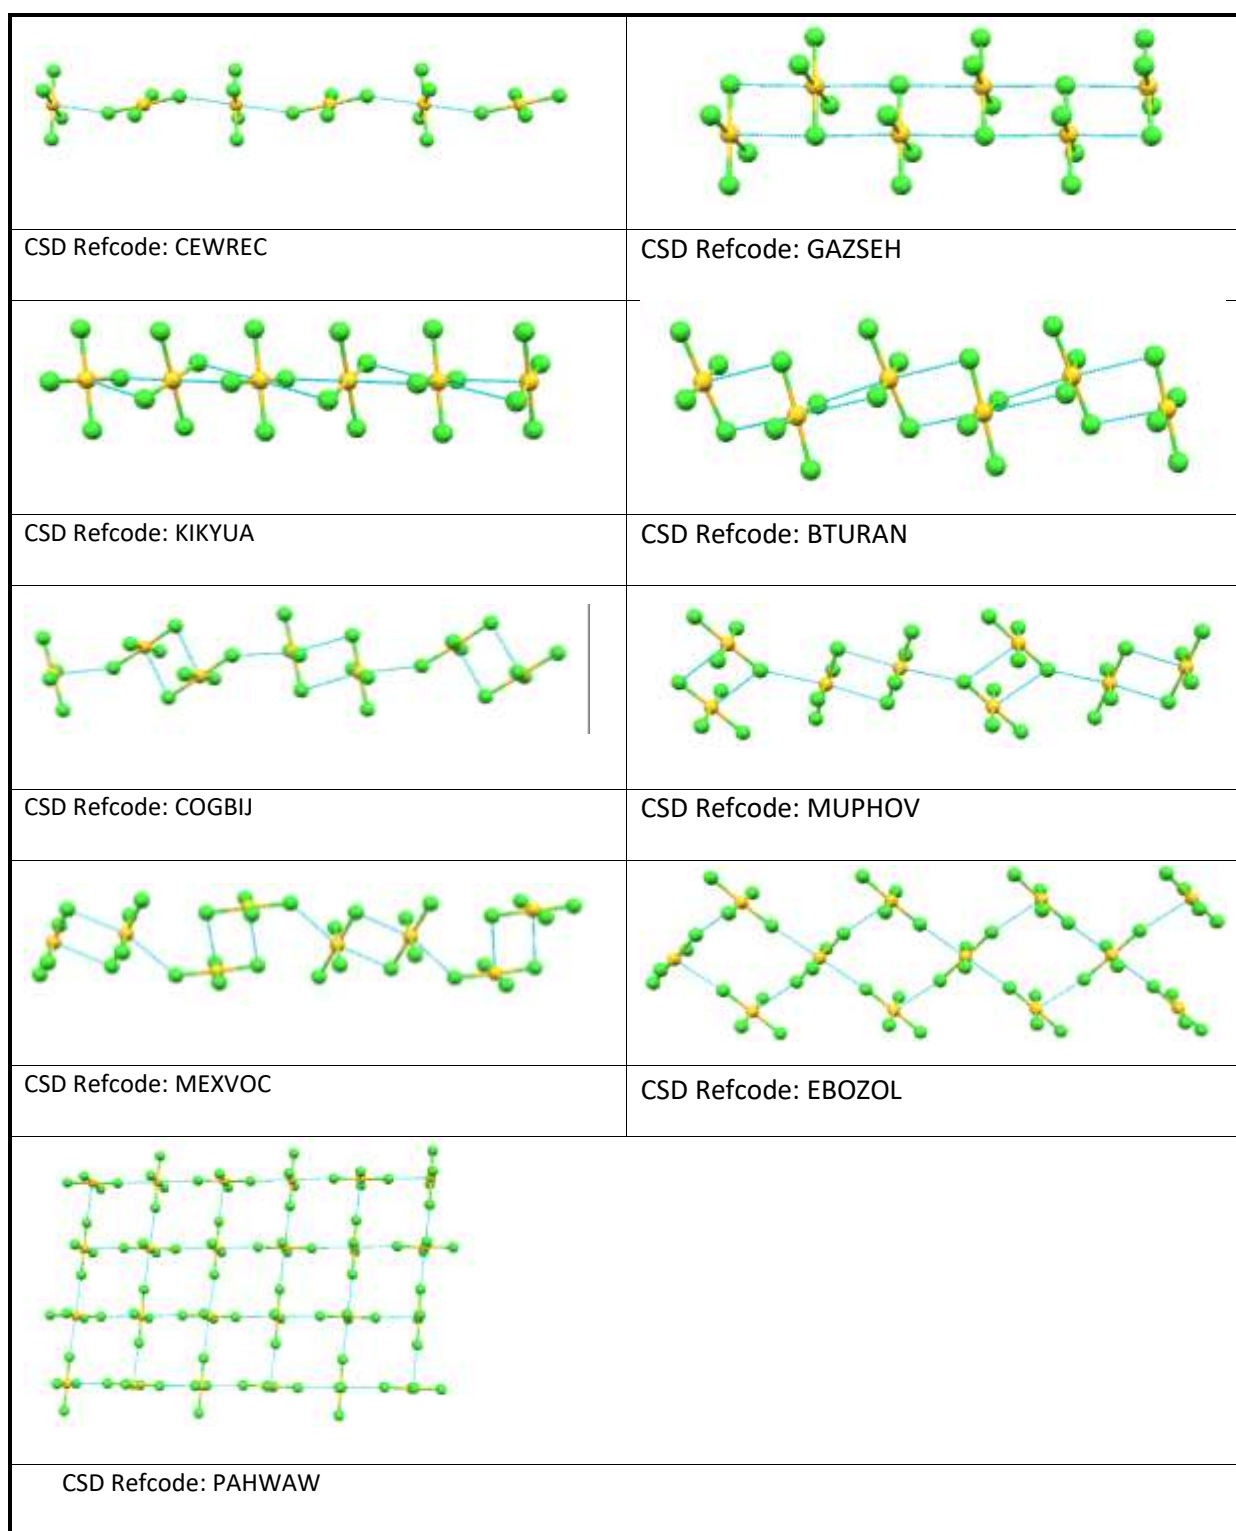

**Figure S1.** Aggregation types of tetrachloroaurate anions in the crystal structures retrieved from the Cambridge Structural Database. The illustrated aggregates are described by the deposit refcode.<sup>1</sup>

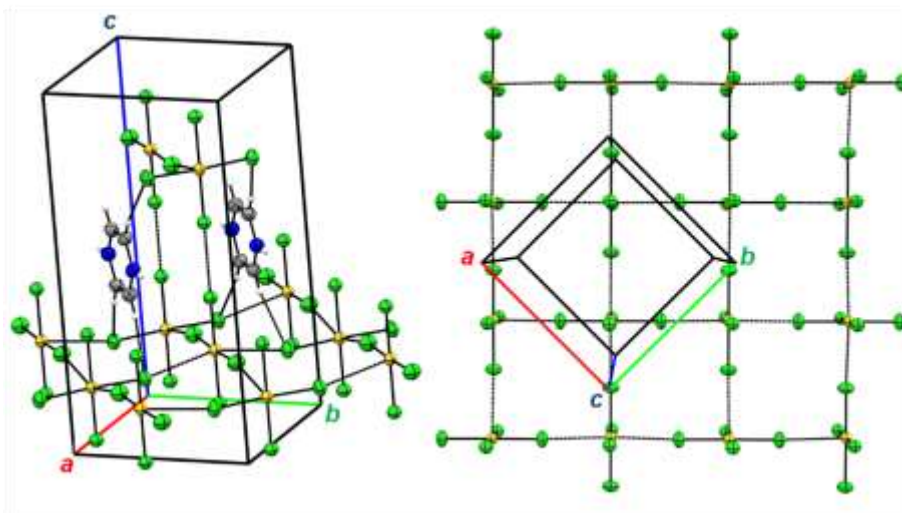

**Figure S2.** Short interionic contacts in the structure of pyrazinium tetrachloroaurate: a perspective view of the structure with the contacts indicated by black lines (left) and one sheet of  $\text{AuCl}_4^-$  anions linked by  $\text{Au}\cdots\text{Cl}$  interactions (right).

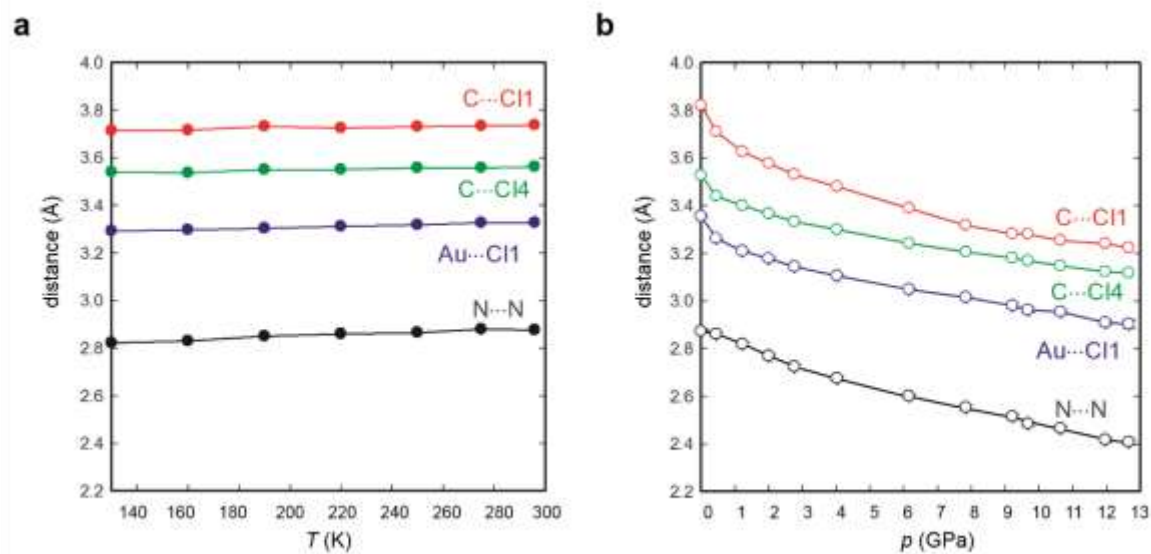

**Figure S3.** Short interionic contacts in the structure of pyrazinium tetrachloroaurate  $\text{PyrH}^+\text{AuCl}_4^-$  as a function of temperature and pressure (*cf.* Figure 3). Note the estimated standard deviations smaller than the symbols.

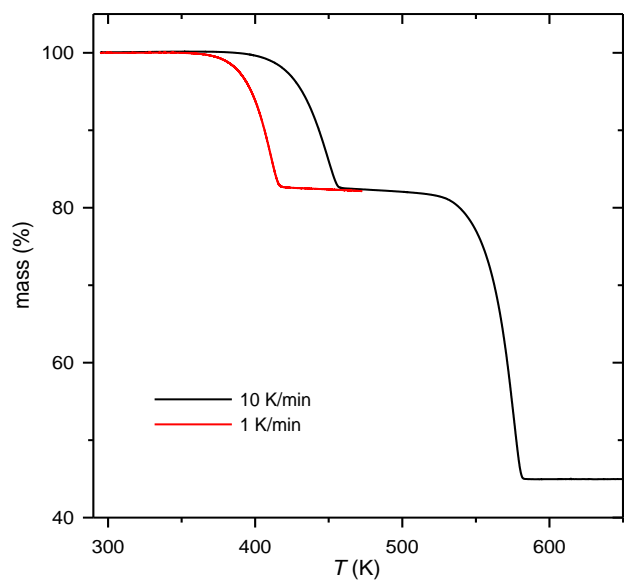

**Figure S4.** TGA runs measured for PyrH<sup>+</sup>AuCl<sub>4</sub><sup>-</sup> at the rate of temperature changes 10 and 1 K/min.

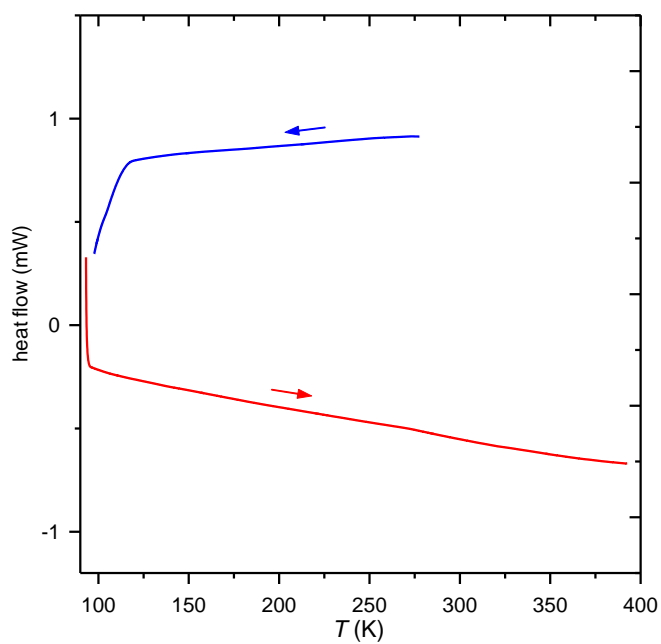

**Figure S5.** DSC cooling and heating runs measured for PyrH<sup>+</sup>AuCl<sub>4</sub><sup>-</sup> at the temperature rate of 10 K/min.

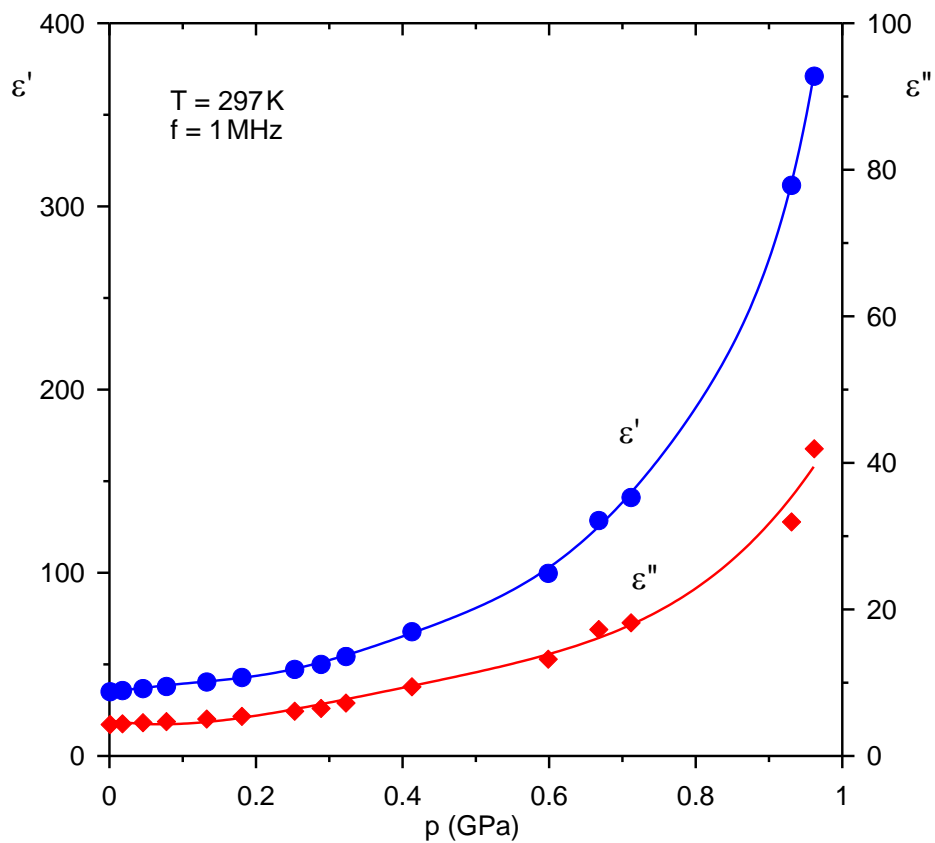

**Figure S6.** Pressure dependence of the real and imaginary parts of electric permittivity measured at 297 K for the 1 MHz frequency of electric field.

**References:**

- [1] C. R. Groom, I. J. Bruno, M. P. Lightfoot, S. C. Ward, The Cambridge Structural Database, *Acta Cryst. Sect. B* **2016**, 72, 171-179.
